# Supplementary material for: Evidence for the Rapid and Divergent Evolution of Mycoplasmas: Structural and Phylogenetic Analysis of Enolases
Source: Frontiers journal article supplement (doi:10.3389/fmolb.2021.811106), 2022-01-25
Supplement: Table_1.DOCX [file Table_1.DOCX]

| **Enolase** | **MP dimeric interface** | | | |
| --- | --- | --- | --- | --- |
| Interaction | Molecule A | | | Molecule B |
| Residues | F16, A17, Y18, Q19, V20, **F21**, D22, **S23**, R24, **G25**, F26, P27, **E42**, M44, **K65**, A66, **Y67**, F68, **D171**, H190, L193, **K194**, **S197**, **E198**, F200, **H201**, A202, Q204, K205, K208, **N213**, T214, N215, **K216**, G217, D218, A223, A242, A243, T395, **E396**, T398, M417, S418, **R419**, **S420**, **E421**, I423, A424, Y426, **N427**, L430, **Q431**, L43 | | | F16, A17, Y18, Q19, V20, **F21**, D22, **S23**, R24, **G25**, F26, P27, V32, **E42**, M44, **K65**, A66, **Y67**, F68, K135, D171, H190, L193, **K194**, **S197**, **E198**, F200, H201, Q204, L212, **N213**, T214, N215, **K216**, G217, D218, A223, T395, **E396**, T398, M417, S418, **R419**, **S420**, **E421**, I423, A424, Y426, **N427**, L430, **Q431**, L434, E435 |
| Interface area ( Å2) : 1765.0 | | | | |
| **Enolase** | **MB dimeric interface** | | | |
| Interaction | Molecule A | Molecule B | | |
| Residues | R6, Q8, ***R10***, ***E11***, I12, **L13**, D14, **S15**, R16, **G17**, **N18**, P19, Q22, E24, G60, N61, W62, **F63**, M69, S161, ***R180***, L183, Q184, **N187**, **K188**, F190, **H191**, N192, K195, G203, **Q205**, **V206**, **G207**, **A213,** T397, **E398**, T400, M419, S420, **R421**, **T422**, **D423**, I425, A426, Y428, **N429**, L432, V433, ***E436*** | | | R6, **Q8**, ***R10***, ***E11***, **I12**, **L13**, D14, **S15**, R16, **G17**, N18, P19, Q22, E24, **G60**, N61, W62, **F63**, M69, S161, ***R180***, L183, Q184, **N187**, **K188**, F190, **H191**, N192, K195, G203, T204, **Q205**, **V206**, **G207**, **A213**, T397, **E398**, T400, M419, S420, **R421**, **T422**, **D423**, I425, A426, Y428, **N429**, L432, V433, ***E436,*** E437 |
| Interface area ( Å2) : 1856.4 | | | | |
| **Enolase** | **MB octameric interafce** | |  | |
| Interaction | Molecule B | | Molecule C | |
| Residues | **F89**, D90, Q91, **R92**, A93, ***K96***, L130, M132, **R136**, **Y137**, **I138**, G139, G140, **A141**, **N142**, H144, L371, M375, **D376**, N379, Q382, **K383**, A384, **N385**, **F409**, **N410**, L438, E440, **Q441**, E443, Y451, K454 | | **F89**, D90, Q91, **R92**, A 93, ***K96***, L130, M132, **R136**, **Y137**, **I138**, G139, G140, **A141**, **N142**, H144, E354, K356, L371, M375, **D376**, N379, Q382, **K383**, A384, N385,F409, **N410**, L438, ***E440***, **Q441**, S442, E443, E445, Y451 | |
| Interface area ( Å2) : 1279.9 | | | | |

**Table 1. The interactions and amino acids between two chains for the formation of different types of enolase interfaces.**

**Bold: hydrogen bond;** **italics: salt bridge; regular: Van der Waals force.**
