# Supplementary material for: Evidence for the Rapid and Divergent Evolution of Mycoplasmas: Structural and Phylogenetic Analysis of Enolases
Source: Frontiers journal article supplement (doi:10.3389/fmolb.2021.811106), 2022-01-25
Supplement: Table_3.DOCX [file Table_3.DOCX]

Tbale 3. Binding affinities of plasminogen/fibronectin with different enolases determined by SPR.

| **Plasminogen (Plg)** | | | **Fibronectin (FN)** | | |
| --- | --- | --- | --- | --- | --- |
| **Species** | **Proteins** | ***K*D ( nM)** | **Species** | **Proteins** | ***K*D ( nM)** |
| *M.hyopneumoniae* | Eno | 62.50±11.1 | *M.hyopneumoniae* | Eno | 74.08±6.4 |
| *M.bovis* | Eno | 95.2±5.2 | *M.bovis* | Eno | 485.8±15.3 |
| *M.pneumoniae* | Eno | 300.0±8.0 | *M.pneumoniae* | Eno | >1000 |
| *B.anthracis* | GAPDH[50] | 572 | *M.hyopneumoniae* | FBA[51] | 468 |
